# Supplementary material for: Regulation of the Dimerization and Activity of SARS-CoV-2 Main Protease through Reversible Glutathionylation of Cysteine 300
Source: PubMed Central journal article supplement (PMC8406260; doi:10.1128/mbio.02094-21), 2021-08-17
Supplement: mbio.02094-21-st001.pdf [file mbio.02094-21-st001.pdf]

**Table S1: RP/HPLC/MALDI-TOF MS Identification of peptides after cysteine alkylation and chymotrypsin digestion of M<sup>pro</sup> or monoglutathionylated M<sup>pro</sup> preparations**

| Peptide Number   | Peptide<br>From:To     | $M_r$ (calc) | $M_r$ (expt) | Delta | R.T.      |
|------------------|------------------------|--------------|--------------|-------|-----------|
| 1                | 9:31 (cys16 & 22)      | 2630.22      | ND           | -     | -         |
| 2                | 38:54 (cys38 & 44)     | 2240.96      | 2239.41.     | 1.55  | 24        |
| 3                | 67:101 (cys85)         | 3987.16      | ND           | -     | -         |
| 41               | 113:118 (cys117)       | 779.35       | 779.33       | -0.02 | 17.7      |
| 5a <sup>1</sup>  | 127:134 (cys128)       | 1090.47      | 1090.45      | -0.02 | 16.9/17.3 |
| 5b <sup>1</sup>  | py127:134 (cys128)     | 1073.47      | 1073.44      | -0.03 | 18.9/19.3 |
| 61               | 141:150 (cys145)       | 1064.46      | 1064.44      | -0.02 | 18.1      |
| 7a <sup>1</sup>  | 155:159 (cys156)       | 694.26       | 694.36       | 0.1   | 9.7       |
| 7b <sup>1</sup>  | 151:159 (cys156)*      | 1199.43      | 1199.46      | 0.03  | 22.5      |
| 8                | 160:161 (cys161)       | 409.13       | ND           | -     | -         |
| 9                | 240:291 (cys265)       | 5560.84      | ND           | -     | -         |
| 10a <sup>1</sup> | 295:305 (cys300)       | 1334.63      | 1334.61      | -0.02 | 19        |
| 10b <sup>1</sup> | 295:306 (cys300)**     | 1462.69      | 1462.66      | -0.03 | 17.4      |
| 111              | 141:150 (cys-sg 145)   | 1244.48      | 1240.67      | -3.81 | 13.7      |
| 11n <sup>1</sup> | 141:150 (native)       | 939.4        | 939.4        | 0     | 15.1      |
| 121              | 151:159 (cys-sg 156) * | 1379.3       | 1379.47      | 0.17  | 19        |
| 12n <sup>1</sup> | 151:159 (native)       | 1074.42      | 1074.41      | -0.01 | 20.7      |
| 131              | 295:306 (cys-sg 300)   | 1642.7       | 1642.68      | -0.02 | 13.7      |
| 13n <sup>1</sup> | 295:306 (native) **    | 1337.63      | 1337.61      | -0.02 | 15.5      |
| 141              | 295:305 (cys-sg 300)   | 1514.66      | 1514.62      | -0.04 | 14.9      |
| 14n <sup>1</sup> | 295:305 (native)       | 1209.58      | 1209.56      | -0.02 | 16.9      |
| 15               | 4:8                    | 651.34       | 651.35       | 0.01  | 9.7***    |
| 16               | 32:37                  | 722.34       | 722.34       | -0.02 | 13.3      |
| 17               | 55:66                  | 1484.76      | 1482.75      | -2.01 | 19.8      |
| 18               | 104:112                | 1044.56      | 1044.56      | 0     | 14.4      |
| 19               | 119:126                | 779.33       | 779.34       | 0.01  | 17.7      |
| 20               | 135:140                | 651.35       | 651.35       | 0     | 9.7***    |
| 21               | 151:154                | 523.22       | 523.23       | 0.01  | 4.1       |
| 22               | 162:181                | 2191.97      | 2192.95      | 0.02  | 20.8      |
| 23               | 186:207                | 2330.18      | 2328.94      | -2.18 | 26        |
| 24               | 210:218                | 1000.5       | 1000.49      | -0.01 | 14.7      |
| 25               | 220:223                | 548.29       | 548.3        | 0.01  | 8.2       |
| 26               | 224:230                | 810.37       | 810.36       | -0.01 | 14.1      |
| 27               | 231:237                | 837.43       | ND           | -     | -         |

Peptides 1-10 are the cysteine containing peptides predicted and, where indicated, identified after chymotrypsin digestion. Peptides 11-14 are the glutathionylated and native forms of peptides identified. Peptides 16-27 are the non-cysteine containing peptides predicted and, where indicated, identified after chymotrypsin digestion. The -sg indicates glutathionylated peptide. \*\*These peptides containing cysteine 156 occur due to lack of cleavage at the 154:155 predicted chymotryptic cleavage site. \*\*\* These peptides containing Cys300 occur due to incomplete cleavage at the 305:306 predicted chymotryptic cleavage site. ND=Not Detected

---
