# Supplementary material for: Regulation of the Dimerization and Activity of SARS-CoV-2 Main Protease through Reversible Glutathionylation of Cysteine 300
Source: PubMed Central journal article supplement (PMC8406260; doi:10.1128/mbio.02094-21), 2021-08-17
Supplement: mbio.02094-21-st002.pdf [file mbio.02094-21-st002.pdf]

**Table S2: RP/HPLC/MALDI-TOF MS Identification of peptides after cysteine alkylation and trypsin/lysC digestion of M<sup>pro</sup> or monoglutathionylated M<sup>pro</sup> preparation**

| Peptide Number | Peptide<br>From:To              | $M_r$ (calc) | $M_r$ (expt) | Delta | R.T. |
|----------------|---------------------------------|--------------|--------------|-------|------|
| 1              | 13:40 (cys16,22,38)             | 3446.56      | 3448.51      | 1.95  | 28.2 |
| 2a             | 41:60 (cys44)                   | 2499.17      | 2500.14      | 0.97  | 24.6 |
| 2b             | 41:61 (cys44) *                 | 2627.26      | 2628.23      | 0.97  | 23.8 |
| 3              | 77:88 (cys85)                   | 1452.71      | 1452.7       | -0.01 | 17.3 |
| 4a             | 106:131 (cys117,128)            | 3026.37      | ND           | ND    | ND   |
| 4b             | 106:137 (cys117,128) **         | 3726.76      | 3728.7       | 1.94  | 26   |
| 5              | 138:188 (cys145,156, 161 )      | 5561.38      | ND           | ND    | ND   |
| 6              | 237:269 (cys265)                | 3699.81      | 3701.75      | 1.94  | 29.2 |
| 7a             | 299:306 (cys300)                | 993.41       | 993.41       | 0     | 15.1 |
| 7b             | 299:306 (cys300)( pGlu) ***     | 976.41       | 976.38       | -0.03 | 17.2 |
| 8              | 77:88 (cys-sg 85)               | 1632.74      | 1632.71      | -0.03 | 13.5 |
| 8n             | 77:88 (native cys 85)           | 1327.66      | 1327.64      | -0.02 | 14.7 |
| 9              | 299:306 (cys-sg 300)            | 1173.44      | 1173.42      | -0.02 | 10.9 |
| 9n             | 299:306 (native cys 300)        | 868.36       | 868.36       | 0     | 11.2 |
| 10             | 299:306 (pGlu) (cys-sg 300)     | 1156.44      | 1156.4       | -0.04 | 12.7 |
| 10n            | 299:306 (pGlu) (native cys 300) | 851.36       | 851.33       | -0.03 | 14   |
| 11             | 1:4                             | 465.22       | 465.23       | 0.01  | 2.9  |
| 12             | 6:12                            | 736.34       | 736.35       | -0.01 | 10.8 |
| 13             | 62:76                           | 1695.87      | 1695.86      | -0.01 | 18.7 |
| 14             | 91:97                           | 734.37       | ND           | ND    | ND   |
| 15             | 132:137                         | 718.39       | 718.37       | -0.02 | 8.8  |
| 16             | 189:217                         | 3032.55      | 3032.54      | -0.01 | 25.6 |
| 17             | 218:222                         | 734.38       | ND           | ND    | ND   |
| 18             | 223:236                         | 1613.8       | 1613.78      | -0.02 | 23.7 |
| 19             | 270:279                         | 1130.54      | 1130.53      | 0.01  | 11.9 |
| 20             | 280:298:                        | 2121.09      | 2122.07      | -0.02 | 27   |

Peptides 1-7 are the cysteine containing peptides predicted and, where indicated, identified after trypsin/lysC digestion. Peptides 8-10 are the glutathionylated and native forms of peptides identified. Peptides 11-20 are the non-cysteine containing peptides predicted and, where indicated, identified after trypsin/lysC digestion. The -sg indicates glutathionylated peptide. \*\*These peptides are the result of the spontaneous deamidation that occurs with peptides containing an N-terminal glutamine and the retention times and molecular masses for this peptide were confirmed with the use of synthetic peptides that were run on RP-HPLC/MS. The retention times (RT) and molecular masses for the Cys300 peptides were confirmed with the use of synthetic peptides that were run on RP-HPLC/MALDI-TOF as native, alkylated or glutathionylated peptides. Peptide samples were analyzed without (-) and with (+) TCEP to remove glutathione moieties. Shown are the calculated native masses [ $M_{r(\text{calc})}$ ] and the experimental masses [ $M_{r(\text{expt0})}$ ]. ND=Not Detected
